# Supplementary material for: Exploring the high catalytic performances of Cu–Co–O/N-doped carbon materials toward the hydrogenation reduction and advanced oxidation reactions of 4-nitrophenol (PNP)
Source: Royal Society of Chemistry journal article supplement (doi:10.1039/d4nj02430c), 2024-01-01
Supplement: d4nj02430c1.pdf [file d4nj02430c1.pdf]

## **Exploring high catalytic performances of Cu-Co-O/N-doped carbon materials toward hydrogenation reduction and advanced oxidation reactions of 4-nitrophenol (PNP)**

Pingyun Li,\* Shiyu Huang, Yanchao Shen, Yadan Wang, Xiaode Guo\*

National Special Superfine Powder Engineering Research Center, School of Chemistry and Chemical Engineering, Nanjing University of Science and Technology, Nanjing 210094, China.

---

\*Corresponding author: lipingyun@njust.edu.cn (Pingyun Li), guoxiaodenj@sina.com (Xiaode Guo)

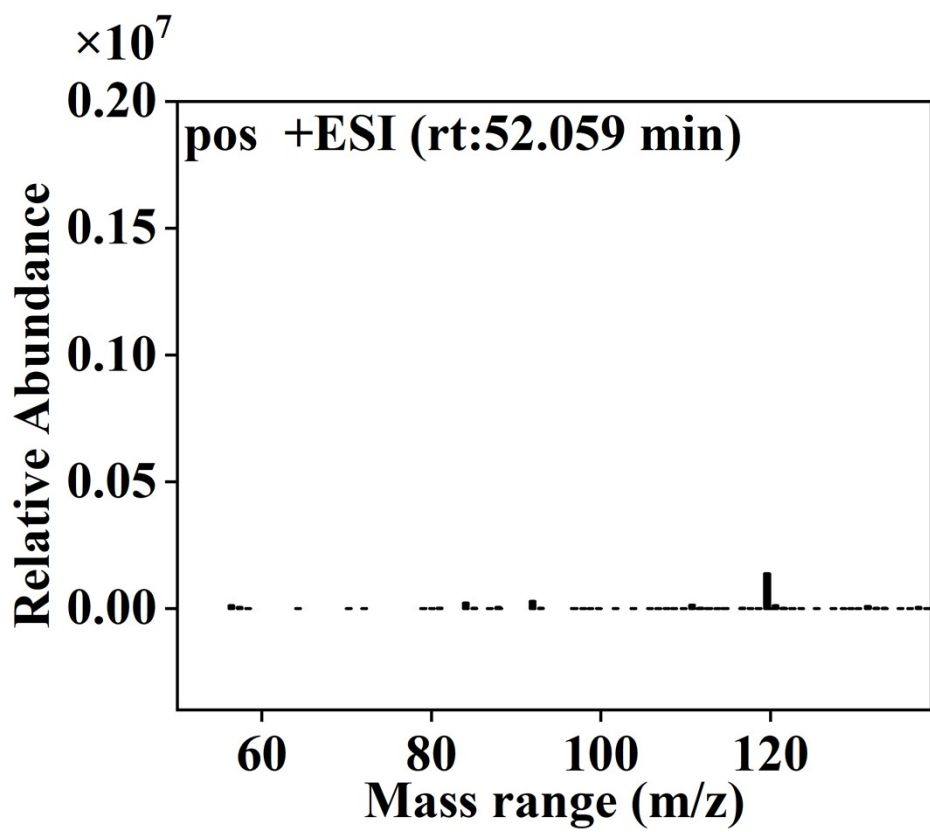

**Figure S1.** LC-MS analysis result of the solution after oxidation reaction of PNP by PMS.

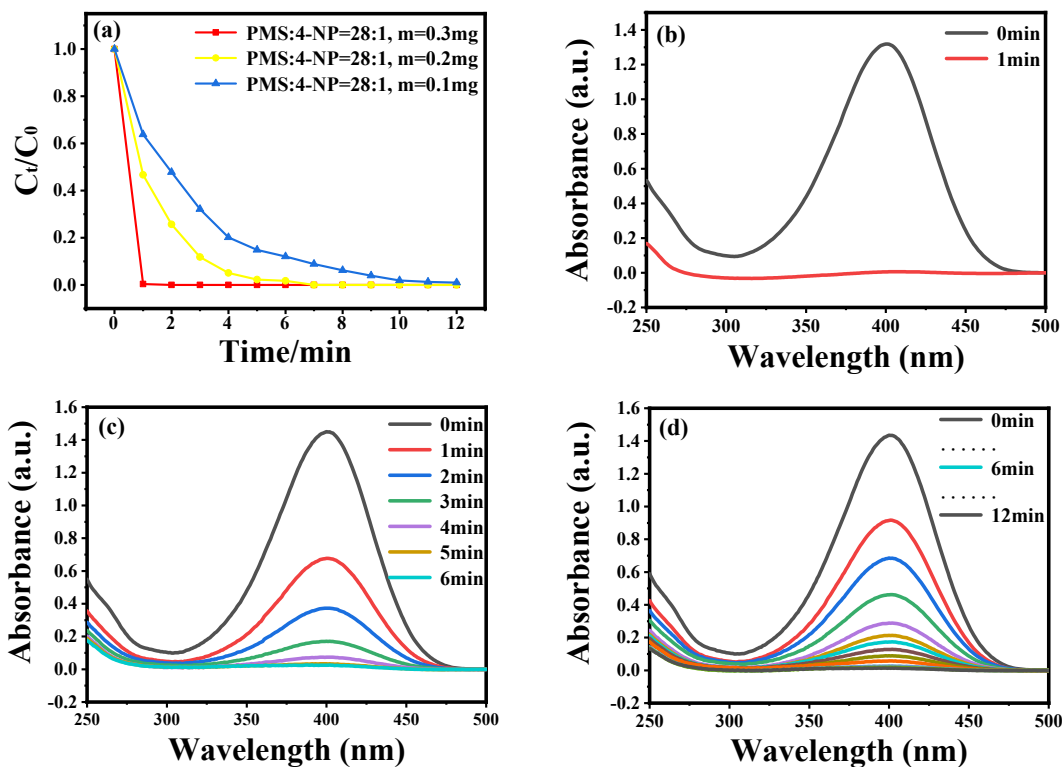

**Figure S2.** The effect of the mass of the catalyst on the advanced oxidation reaction of PNP (a-d) where the mass is 0.3 mg (b), 0.2 mg (c) and 0.1 mg (d).

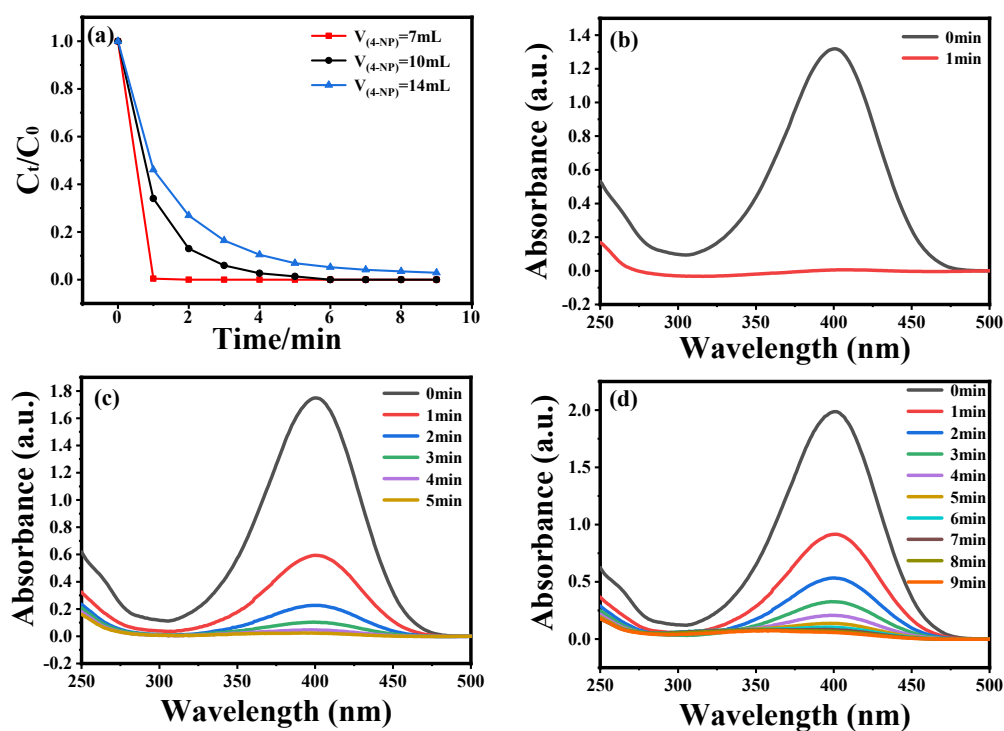

**Figure S3.** The effect of the volume of the PNP solution on the advanced oxidation reaction of PNP (a-d) where the volume is 7 mL (b), 10 mL (c) and 14 mL (d).
